# Supplementary material
Source: ML conference proceedings conference paper supplement (https://openreview.net/forum?id=1W2WuCYbz_C)
Supplement: supplementary_material [file attachment]

---

# Supplementary Material: A Comprehensively Tight Analysis of Gradient Descent for PCA

---

**Zhiqiang Xu, Ping Li**

Cognitive Computing Lab  
Baidu Research

No. 10 Xibeiwang East Road, Beijing 100193, China  
10900 NE 8th St. Bellevue, Washington 98004, USA  
{xuzhiqiang04, liping11}@baidu.com

**Theorem 2** The Riemannian gradient descent for Problem (1) in the main text with step-size  $\eta = O(1) \leq \frac{1}{\lambda_1 - \lambda_n}$  converges in  $T = O(\frac{1}{\epsilon} \log \frac{n}{\epsilon})$  iterations, i.e.,  $\lambda_1 - \mathbf{x}_T^\top \mathbf{A} \mathbf{x}_T < \epsilon$ .

**Proof** We assume again that  $\lambda_1 > \lambda_n$ , and  $\eta \leq \frac{1}{\lambda_1 - \lambda_n}$  such that  $h_t(\lambda_i) = 1 + \eta(\lambda_i - \mathbf{x}_t^\top \mathbf{A} \mathbf{x}_t) \geq 0$  for all  $i$  and  $t$ . In what follows, we show that no matter whether  $\lambda_1$  is significantly larger than  $\lambda_2$  in the sense that  $h_0(\lambda_1) \geq (1 + \frac{\delta}{2})h_0(\lambda_2)$  for  $0 < \delta \leq 2$ , it always holds that  $\lambda_1 - \mathbf{x}_T^\top \mathbf{A} \mathbf{x}_T < \frac{2}{\eta}\epsilon$ . Throughout the proof, we take  $T = \lceil \frac{2}{\delta} \log \frac{n(1+\tan^2 \theta_0)}{\epsilon} \rceil + 1$ , where  $\theta_0 = \theta(\mathbf{x}_0, \mathbf{v}_1)$ .

Case 1 that  $h_0(\lambda_1) \geq (1 + \frac{\delta}{2})h_0(\lambda_2)$ . Consider the polynomial

$$p_T(x) = \sqrt{(1 + \frac{\delta}{2})h_0(\lambda_2)} \prod_{t=0}^{T-1} \frac{h_t(x)}{(1 + \frac{\delta}{2})h_t(\lambda_2)}$$

and its matrix form  $p_T(\mathbf{A}) = \sum_{i=1}^n p_T(\lambda_i) \mathbf{v}_i \mathbf{v}_i^\top = \mathbf{V}_n p_T(\boldsymbol{\Sigma}_n) \mathbf{V}_n^\top$ , where  $p_T(\boldsymbol{\Sigma}_n) = \text{diag}(p_T(\lambda_1), \dots, p_T(\lambda_n))$ . Since  $\eta \leq \frac{1}{\lambda_1 - \lambda_n}$ ,  $h_t(x)$  for all  $t$  and thus  $p_T(x)$  are nonnegative for  $x \in [\lambda_n, \lambda_1]$ . Particularly, on the one hand,

**Fact 1.** For  $x \in [\lambda_n, \lambda_2]$ ,  $h_0(\lambda_1) \geq (1 + \frac{\delta}{2})h_0(x)$  implies that  $h_t(\lambda_1) \geq (1 + \frac{\delta}{2})h_t(x)$  for all  $t$ , by the following lemma

**Lemma 4** If  $\eta \leq \frac{2}{\lambda_1 - \lambda_n}$  then  $\mathbf{x}_{t+1}^\top \mathbf{A} \mathbf{x}_{t+1} \geq \mathbf{x}_t^\top \mathbf{A} \mathbf{x}_t$ .

Thus, the first property of  $p_T(x)$  is that

$$p_T(\lambda_1) = \sqrt{(1 + \frac{\delta}{2})h_0(\lambda_2)} \frac{h_0(\lambda_1)}{(1 + \frac{\delta}{2})h_0(\lambda_2)} \prod_{t=1}^{T-1} \frac{h_t(\lambda_1)}{(1 + \frac{\delta}{2})h_t(\lambda_2)} \geq \sqrt{h_0(\lambda_1)}. \quad (6)$$

On the other hand, noting that  $h_t(\lambda_2) \geq h_t(\lambda_i)$  for all  $i \geq 2$ , it's easy to see  $p_T(x)$ 's second property:

$$p_T(\lambda_i) \leq \sqrt{h_0(\lambda_2)} (1 + \frac{\delta}{2})^{-T + \frac{1}{2}}, \quad i = 2, \dots, n. \quad (7)$$

We then can rewrite  $\mathbf{x}_T$  from Eq. (4) in the main text as

$$\mathbf{x}_T = \frac{\prod_{t=0}^{T-1} (\mathbf{I} + \eta(\mathbf{A} - \mathbf{x}_t^\top \mathbf{A} \mathbf{x}_t \mathbf{I})) \mathbf{x}_0}{\| \prod_{t=0}^{T-1} (\mathbf{I} + \eta(\mathbf{A} - \mathbf{x}_t^\top \mathbf{A} \mathbf{x}_t \mathbf{I})) \mathbf{x}_0 \|_2} = \frac{\prod_{t=0}^{T-1} h_t(\mathbf{A}) \mathbf{x}_0}{\| \prod_{t=0}^{T-1} h_t(\mathbf{A}) \mathbf{x}_0 \|_2} = \frac{p_T(\mathbf{A}) \mathbf{x}_0}{\| p_T(\mathbf{A}) \mathbf{x}_0 \|_2}.$$

Let  $[\cdot]_1$  be the best rank-1 approximation of a matrix for the Frobenius norm. For example,  $[p_T(\mathbf{A})]_1 = p_T(\lambda_1) \mathbf{v}_1 \mathbf{v}_1^\top$ , due to that  $p_T(\lambda_1) \geq \sqrt{h_0(\lambda_1)} \geq \sqrt{h_0(\lambda_i)} \geq p_T(\lambda_i) \geq 0$  for all  $i \geq 2$ ,

by Eq. (6)-(7). By Lemma 14 in Musco et al. [10], we have the following Frobenius-norm rank-1 approximation inequality:

$$\|p_T(\mathbf{A}) - \mathbf{x}_T \mathbf{x}_T^\top p_T(\mathbf{A})\|_F^2 \leq (1 + \tan^2 \theta_0) \|p_T(\mathbf{A}) - [p_T(\mathbf{A})]_1\|_F^2. \quad (8)$$

For the remainder on the right, by Eq. (7), we have that

$$\begin{aligned} \|p_T(\mathbf{A}) - [p_T(\mathbf{A})]_1\|_F^2 &= \left\| \sum_{i=2}^n p_T(\lambda_i) \mathbf{v}_i \mathbf{v}_i^\top \right\|_F^2 = \sum_{i=2}^n p_T^2(\lambda_i) \\ &\leq (n-1) h_0(\lambda_2) \left(1 + \frac{\delta}{2}\right)^{-2T+1}, \end{aligned} \quad (9)$$

where

$$\begin{aligned} \left(1 + \frac{\delta}{2}\right)^{-2T+1} &< \left(1 + \frac{\delta}{2}\right)^{-2(T-1)} = \exp\{-2(T-1) \log(1 + \frac{\delta}{2})\} \\ &\leq \exp\left\{-\frac{4}{\delta} \log \frac{n(1+\tan^2 \theta_0)}{\epsilon} \frac{\delta/2}{1+\delta/2}\right\} \leq \frac{\epsilon}{n(1+\tan^2 \theta_0)}. \end{aligned} \quad (10)$$

For the rank-1 approximation error on the left, it holds that

$$\begin{aligned} \|p_T(\mathbf{A}) - \mathbf{x}_T \mathbf{x}_T^\top p_T(\mathbf{A})\|_F^2 &= \|p_T(\mathbf{A})\|_F^2 - \|\mathbf{x}_T \mathbf{x}_T^\top p_T(\mathbf{A})\|_F^2 \\ &= \|p_T(\boldsymbol{\Sigma}_n)\|_F^2 - \|\mathbf{x}_T^\top \mathbf{V}_n p_T(\boldsymbol{\Sigma}_n)\|_F^2 \\ &= \sum_{i=1}^n (1 - (\mathbf{x}_T^\top \mathbf{v}_i)^2) p_T^2(\lambda_i) \geq (1 - (\mathbf{x}_T^\top \mathbf{v}_1)^2) p_T^2(\lambda_1) \\ &\geq (1 - (\mathbf{x}_T^\top \mathbf{v}_1)^2) h_0(\lambda_1), \end{aligned} \quad (11)$$

where the second equality is due to the orthogonal invariance for the Frobenius norm. By Eq. (8)-(11), we then get that  $(1 - (\mathbf{x}_T^\top \mathbf{v}_1)^2) h_0(\lambda_1) < \epsilon h_0(\lambda_2)$ . Hence, it holds that

$$h_0(\lambda_1) - \mathbf{x}_T^\top h_0(\mathbf{A}) \mathbf{x}_T = h_0(\lambda_1) - \sum_{i=1}^n (\mathbf{x}_T^\top \mathbf{v}_i)^2 h_0(\lambda_i) \leq (1 - (\mathbf{x}_T^\top \mathbf{v}_1)^2) h_0(\lambda_1) < \epsilon h_0(\lambda_2),$$

which gives us  $\lambda_1 - \mathbf{x}_T^\top \mathbf{A} \mathbf{x}_T < \frac{2}{\eta} \epsilon$ , by noting that  $h_0(\lambda_1) - \mathbf{x}_T^\top h_0(\mathbf{A}) \mathbf{x}_T = \eta(\lambda_1 - \mathbf{x}_T^\top \mathbf{A} \mathbf{x}_T)$  and  $h_0(\lambda_i) = 1 + \eta(\lambda_i - \mathbf{x}_0^\top \mathbf{A} \mathbf{x}_0) \leq 1 + \eta(\lambda_i - \lambda_n) \leq 2$  for all  $i$ .

**Case 2** that  $h_0(\lambda_1) < (1 + \frac{\delta}{2}) h_0(\lambda_2)$ . Consider the polynomial

$$q_T(x) = \sqrt{h_0(\lambda_1)} \prod_{t=0}^{T-1} \frac{h_t(x)}{h_t(\lambda_1)}.$$

We can write that

$$\mathbf{x}_T = \frac{\prod_{t=0}^{T-1} h_t(\mathbf{A}) \mathbf{x}_0}{\left\| \prod_{t=0}^{T-1} h_t(\mathbf{A}) \mathbf{x}_0 \right\|_2} = \frac{q_T(\mathbf{A}) \mathbf{x}_0}{\|q_T(\mathbf{A}) \mathbf{x}_0\|_2}.$$

Define the index set

$$\alpha = \left\{ i : \frac{1}{1+\frac{\delta}{2}} h_0(\lambda_1) \leq h_0(\lambda_i) < h_0(\lambda_1) \right\}.$$

Note that  $|\alpha| \geq 1$  since  $2 \in \alpha$ . Let

$$\begin{aligned} \mathbf{V}_\alpha &= [\mathbf{v}_2 \ \cdots \ \mathbf{v}_{|\alpha|+1}], \quad \mathbf{V}_{-\alpha} = [\mathbf{v}_1 \ \mathbf{v}_{|\alpha|+2} \ \cdots \ \mathbf{v}_n], \\ \boldsymbol{\Sigma}_\alpha &= \text{diag}(\lambda_2, \dots, \lambda_{|\alpha|+1}), \quad \boldsymbol{\Sigma}_{-\alpha} = \text{diag}(\lambda_1, \lambda_{|\alpha|+2}, \dots, \lambda_n). \end{aligned}$$

We then can have  $q_T(\mathbf{A})$  decomposed into

$$\begin{aligned} q_T(\mathbf{A}) &= \sum_{i \in \alpha} q_T(\lambda_i) \mathbf{v}_i \mathbf{v}_i^\top + \sum_{i \notin \alpha} q_T(\lambda_i) \mathbf{v}_i \mathbf{v}_i^\top \\ &= \mathbf{V}_\alpha q_T(\boldsymbol{\Sigma}_\alpha) \mathbf{V}_\alpha^\top + \mathbf{V}_{-\alpha} q_T(\boldsymbol{\Sigma}_{-\alpha}) \mathbf{V}_{-\alpha}^\top \triangleq q_T(\mathbf{A}_\alpha) + q_T(\mathbf{A}_{-\alpha}), \end{aligned}$$

and accordingly,

$$\begin{aligned}\mathbf{x}_T &= \frac{q_T(\mathbf{A}_\alpha)\mathbf{x}_0}{\|q_T(\mathbf{A}_\alpha)\mathbf{x}_0\|_2} + \frac{q_T(\mathbf{A}_{-\alpha})\mathbf{x}_0}{\|q_T(\mathbf{A}_{-\alpha})\mathbf{x}_0\|_2} = \mathbf{V}_\alpha \frac{q_T(\boldsymbol{\Sigma}_\alpha)\mathbf{V}_\alpha^\top \mathbf{x}_0}{\|q_T(\mathbf{A})\mathbf{x}_0\|_2} + \mathbf{V}_{-\alpha} \frac{q_T(\boldsymbol{\Sigma}_{-\alpha})\mathbf{V}_{-\alpha}^\top \mathbf{x}_0}{\|q_T(\mathbf{A})\mathbf{x}_0\|_2} \\ &\triangleq \mathbf{V}_\alpha \tilde{\mathbf{y}}_T^{(\alpha)} + \mathbf{V}_{-\alpha} \tilde{\mathbf{y}}_T^{(-\alpha)} \triangleq \tilde{\mathbf{x}}_T^{(\alpha)} + \tilde{\mathbf{x}}_T^{(-\alpha)} \triangleq \|\tilde{\mathbf{x}}_T^{(\alpha)}\|_2 \mathbf{x}_T^{(\alpha)} + \|\tilde{\mathbf{x}}_T^{(-\alpha)}\|_2 \mathbf{x}_T^{(-\alpha)}.\end{aligned}$$

In order to analyze  $\mathbf{x}_T^\top h_0(\mathbf{A})\mathbf{x}_T = \|h_0^{\frac{1}{2}}(\mathbf{A})\mathbf{x}_T\|_2^2$ , we first check  $\|h_0^{\frac{1}{2}}(\mathbf{A})\mathbf{x}_T^{(\alpha)}\|_2^2$  as follows:

$$\begin{aligned}\|h_0^{\frac{1}{2}}(\mathbf{A})\mathbf{x}_T^{(\alpha)}\|_2^2 &= \frac{(\tilde{\mathbf{y}}_T^{(\alpha)})^\top \mathbf{V}_\alpha^\top h_0(\mathbf{A})\mathbf{V}_\alpha \tilde{\mathbf{y}}_T^{(\alpha)}}{\|\tilde{\mathbf{y}}_T^{(\alpha)}\|_2^2} = \frac{(\tilde{\mathbf{y}}_T^{(\alpha)})^\top h_0(\boldsymbol{\Sigma}_\alpha)\tilde{\mathbf{y}}_T^{(\alpha)}}{\|\tilde{\mathbf{y}}_T^{(\alpha)}\|_2^2} \\ &\geq \frac{1}{1 + \frac{\delta}{2}} h_0(\lambda_1) \geq (1 - \frac{\delta}{2}) h_0(\lambda_1),\end{aligned}\quad (12)$$

where the first inequality is by the definition of the index set. To check  $\|h_0^{\frac{1}{2}}(\mathbf{A})\mathbf{x}_T^{(-\alpha)}\|_2^2$ , similarly to Case 1, we consider the rank-1 approximation by  $q_T(\mathbf{A}_{-\alpha})\mathbf{x}_0$ . Note that  $\mathbf{x}_T^{(-\alpha)} = \frac{\tilde{\mathbf{x}}_T^{(-\alpha)}}{\|\tilde{\mathbf{x}}_T^{(-\alpha)}\|_2} = \frac{q_T(\mathbf{A}_{-\alpha})\mathbf{x}_0}{\|q_T(\mathbf{A}_{-\alpha})\mathbf{x}_0\|_2}$ . We then have the approximation inequality:

$$\|q_T(\mathbf{A}_{-\alpha}) - \mathbf{x}_T^{(-\alpha)}(\mathbf{x}_T^{(-\alpha)})^\top q_T(\mathbf{A}_{-\alpha})\|_F^2 \leq (1 + \tan^2 \theta_0) \|q_T(\mathbf{A}_{-\alpha}) - [q_T(\mathbf{A}_{-\alpha})]_1\|_F^2. \quad (13)$$

Here, noting  $q_T(\lambda_1) = \sqrt{h_0(\lambda_1)} \geq q_T(\lambda_i)$  for all  $i \geq 2$ , it holds that

$$\begin{aligned}&\|q_T(\mathbf{A}_{-\alpha}) - \mathbf{x}_T^{(-\alpha)}(\mathbf{x}_T^{(-\alpha)})^\top q_T(\mathbf{A}_{-\alpha})\|_F^2 \\ &= \|q_T(\boldsymbol{\Sigma}_{-\alpha})\|_F^2 - \|(\mathbf{x}_T^{(-\alpha)})^\top \mathbf{V}_{-\alpha} q_T(\boldsymbol{\Sigma}_{-\alpha})\|_F^2 = \sum_{i \notin \alpha} (1 - ((\mathbf{x}_T^{(-\alpha)})^\top \mathbf{v}_i)^2) q_T^2(\lambda_i) \\ &\geq (1 - ((\mathbf{x}_T^{(-\alpha)})^\top \mathbf{v}_1)^2) q_T^2(\lambda_1) \geq (1 - ((\mathbf{x}_T^{(-\alpha)})^\top \mathbf{v}_1)^2) h_0(\lambda_1).\end{aligned}\quad (14)$$

At the same time, since it holds at  $t = 0$  by the definition of  $\alpha$ , then by Fact 1 we must have that  $h_t(\lambda_i) \leq \frac{1}{1 + \frac{\delta}{2}} h_t(\lambda_1)$  for any  $i \notin \{1\} \cup \alpha$ . Thus, similarly to Eq. (9)-(10), we get that

$$\|q_T(\mathbf{A}_{-\alpha}) - [q_T(\mathbf{A}_{-\alpha})]_1\|_F^2 = \sum_{i \notin \{1\} \cup \alpha} q_T^2(\lambda_i) \leq (n - |\alpha| - 1) (1 + \frac{\delta}{2})^{-2T} h_0(\lambda_1) < \frac{h_0(\lambda_1)}{1 + \tan^2 \theta_0} \epsilon. \quad (15)$$

By Eq. (13)-(15), we can write that

$$\begin{aligned}h_0(\lambda_1) - (\mathbf{x}_T^{(-\alpha)})^\top h_0(\mathbf{A}_{-\alpha})\mathbf{x}_T^{(-\alpha)} &= h_0(\lambda_1) - \sum_{i \notin \alpha} ((\mathbf{x}_T^{(-\alpha)})^\top \mathbf{v}_i)^2 h_0(\lambda_i) \\ &\leq h_0(\lambda_1) - ((\mathbf{x}_T^{(-\alpha)})^\top \mathbf{v}_1)^2 h_0(\lambda_1) < h_0(\lambda_1) \epsilon.\end{aligned}$$

Thus, it holds that

$$\|h_0^{\frac{1}{2}}(\mathbf{A})\mathbf{x}_T^{(-\alpha)}\|_2^2 = \|h_0^{\frac{1}{2}}(\mathbf{A}_{-\alpha})\mathbf{x}_T^{(-\alpha)}\|_2^2 = (\mathbf{x}_T^{(-\alpha)})^\top h_0(\mathbf{A}_{-\alpha})\mathbf{x}_T^{(-\alpha)} > (1 - \epsilon) h_0(\lambda_1). \quad (16)$$

By Eq. (12) with  $\delta = 2\epsilon$  (assuming  $\epsilon \leq 1$ ) and Eq. (16), we get that

$$\begin{aligned}\mathbf{x}_T^\top h_0(\mathbf{A})\mathbf{x}_T &= \|h_0^{\frac{1}{2}}(\mathbf{A})\mathbf{x}_T\|_2^2 \\ &= \|h_0^{\frac{1}{2}}(\mathbf{A})\tilde{\mathbf{x}}_T^{(\alpha)}\|_2^2 + \|h_0^{\frac{1}{2}}(\mathbf{A})\tilde{\mathbf{x}}_T^{(-\alpha)}\|_2^2 \\ &= \|\tilde{\mathbf{x}}_T^{(\alpha)}\|_2^2 \|h_0^{\frac{1}{2}}(\mathbf{A})\mathbf{x}_T^{(\alpha)}\|_2^2 + \|\tilde{\mathbf{x}}_T^{(-\alpha)}\|_2^2 \|h_0^{\frac{1}{2}}(\mathbf{A})\mathbf{x}_T^{(-\alpha)}\|_2^2 \\ &> (\|\tilde{\mathbf{x}}_T^{(\alpha)}\|_2^2 + \|\tilde{\mathbf{x}}_T^{(-\alpha)}\|_2^2) (1 - \epsilon) h_0(\lambda_1) \\ &= (1 - \epsilon) h_0(\lambda_1),\end{aligned}$$

and thus  $h_0(\lambda_1) - \mathbf{x}_T^\top h_0(\mathbf{A})\mathbf{x}_T < \epsilon h_0(\lambda_1)$ , i.e.,  $\lambda_1 - \mathbf{x}_T^\top \mathbf{A} \mathbf{x}_T < \frac{2}{\eta} \epsilon$ .

Therefore, we have proved that  $\lambda_1 - \mathbf{x}_T^\top \mathbf{A} \mathbf{x}_T < \frac{2}{\eta} \epsilon$  in both cases for  $T = \lceil \frac{1}{\epsilon} \log \frac{n(1 + \tan^2 \theta_0)}{\epsilon} \rceil + 1$  (noting that we have taken  $\delta = 2\epsilon$  in Case 2). Finally, as long as  $\eta = O(1)$ , we could write with  $\epsilon$  rescaling that  $\lambda_1 - \mathbf{x}_T^\top \mathbf{A} \mathbf{x}_T < \epsilon$  for  $T = O(\frac{1}{\epsilon} \log \frac{n}{\epsilon})$ .  $\square$

We are left with proving Fact 1 and Lemma 4.

**Proof of Fact 1** For any  $t$  and  $x \in [\lambda_n, \lambda_2]$ ,

$$\begin{aligned}
& h_t(\lambda_1) - (1 + \frac{\delta}{2})h_t(x) \\
&= 1 + \eta(\lambda_1 - \mathbf{x}_t^\top \mathbf{A} \mathbf{x}_t) - (1 + \frac{\delta}{2})(1 + \eta(x - \mathbf{x}_t^\top \mathbf{A} \mathbf{x}_t)) \\
&= 1 + \eta(\lambda_1 - \mathbf{x}_0^\top \mathbf{A} \mathbf{x}_0) - (1 + \frac{\delta}{2})(1 + \eta(x - \mathbf{x}_0^\top \mathbf{A} \mathbf{x}_0)) \\
&\quad + \eta(\mathbf{x}_0^\top \mathbf{A} \mathbf{x}_0 - \mathbf{x}_t^\top \mathbf{A} \mathbf{x}_t) - (1 + \frac{\delta}{2})\eta(\mathbf{x}_0^\top \mathbf{A} \mathbf{x}_0 - \mathbf{x}_t^\top \mathbf{A} \mathbf{x}_t) \\
&= h_0(\lambda_1) - (1 + \frac{\delta}{2})h_0(x) - \frac{\delta}{2}\eta(\mathbf{x}_0^\top \mathbf{A} \mathbf{x}_0 - \mathbf{x}_t^\top \mathbf{A} \mathbf{x}_t) \geq 0,
\end{aligned}$$

where the last equality is by the hypothesis and Lemma 4.  $\square$

**Proof of Lemma 4** Let  $\tilde{\mathbf{g}}_t = \tilde{\nabla} f(\mathbf{x}_t)$ . Then

$$\begin{aligned}
& \|\mathbf{x}_t - \eta \tilde{\mathbf{g}}_t\|_2^2 (\mathbf{x}_{t+1}^\top \mathbf{A} \mathbf{x}_{t+1} - \mathbf{x}_t^\top \mathbf{A} \mathbf{x}_t) \\
&= (\mathbf{x}_t - \eta \tilde{\mathbf{g}}_t)^\top \mathbf{A} (\mathbf{x}_t - \eta \tilde{\mathbf{g}}_t) - \mathbf{x}_t^\top \mathbf{A} \mathbf{x}_t \|\mathbf{x}_t - \eta \tilde{\mathbf{g}}_t\|_2^2 \\
&= \mathbf{x}_t^\top \mathbf{A} \mathbf{x}_t - 2\eta \mathbf{x}_t^\top \mathbf{A} \tilde{\mathbf{g}}_t + \eta^2 \tilde{\mathbf{g}}_t^\top \mathbf{A} \tilde{\mathbf{g}}_t - (1 + \eta^2 \|\tilde{\mathbf{g}}_t\|_2^2) \mathbf{x}_t^\top \mathbf{A} \mathbf{x}_t \\
&= 2\eta \tilde{\mathbf{g}}_t^\top \tilde{\mathbf{g}}_t + \eta^2 \tilde{\mathbf{g}}_t^\top \mathbf{A} \tilde{\mathbf{g}}_t - \eta^2 \mathbf{x}_t^\top \mathbf{A} \mathbf{x}_t \|\tilde{\mathbf{g}}_t\|_2^2 \\
&= \eta \tilde{\mathbf{g}}_t^\top (2\mathbf{I} + \eta \mathbf{A} - \eta \mathbf{x}_t^\top \mathbf{A} \mathbf{x}_t \mathbf{I}) \tilde{\mathbf{g}}_t \\
&\geq \eta(2 + \eta(\lambda_n - \lambda_1)) \|\tilde{\mathbf{g}}_t\|_2^2 = \eta(2 - \eta(\lambda_1 - \lambda_n)) \|\tilde{\mathbf{g}}_t\|_2^2,
\end{aligned}$$

where we have used that  $\mathbf{x}_t^\top \tilde{\mathbf{g}}_t = 0$  and

$$\begin{aligned}
-\mathbf{x}_t^\top \mathbf{A} \tilde{\mathbf{g}}_t &= -\mathbf{x}_t^\top \mathbf{A} (\mathbf{I} - \mathbf{x}_t \mathbf{x}_t^\top) \mathbf{A} \mathbf{x}_t \\
&= -\mathbf{x}_t^\top \mathbf{A} (\mathbf{I} - \mathbf{x}_t \mathbf{x}_t^\top)^2 \mathbf{A} \mathbf{x}_t = \tilde{\mathbf{g}}_t^\top \tilde{\mathbf{g}}_t.
\end{aligned}$$

Thus, when  $2 - \eta(\lambda_1 - \lambda_n) \geq 0$ , i.e.,  $\eta \leq \frac{2}{\lambda_1 - \lambda_n}$ , it holds that  $\mathbf{x}_{t+1}^\top \mathbf{A} \mathbf{x}_{t+1} \geq \mathbf{x}_t^\top \mathbf{A} \mathbf{x}_t$ .  $\square$
